# Supplementary material
Source: PubMed Central journal article supplement (PMC7416478)
Supplement: NIHMS1580728-supplement-1.pdf [file NIHMS1580728-supplement-1.pdf]

**SUPPLEMENTAL FIGURES**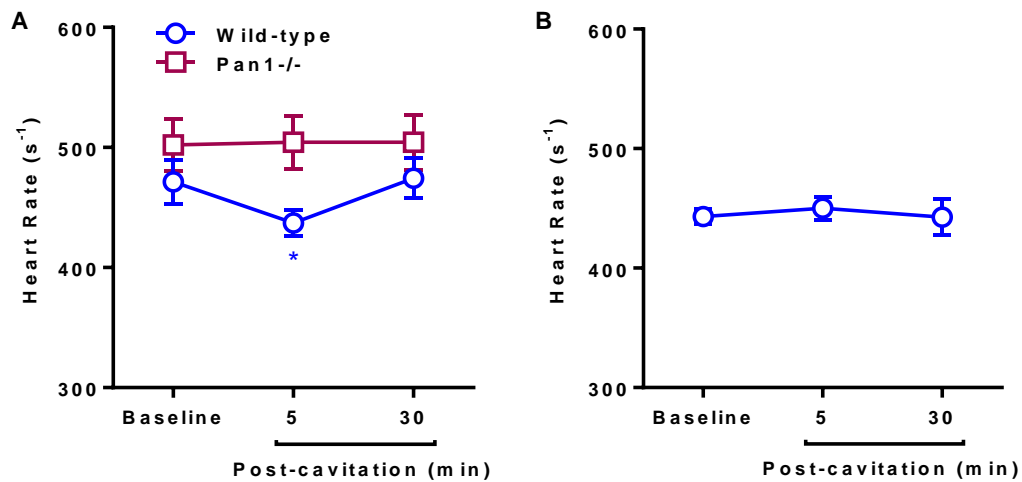

**Supplemental Figure 1.** Mean ( $\pm$ SEM) values for heart rate in (A) wild-type and Pan1<sup>-/-</sup> mice undergoing cavitation, and (B) control sham-treated mice. \* $p < 0.05$  vs Pan1<sup>-/-</sup> mice.

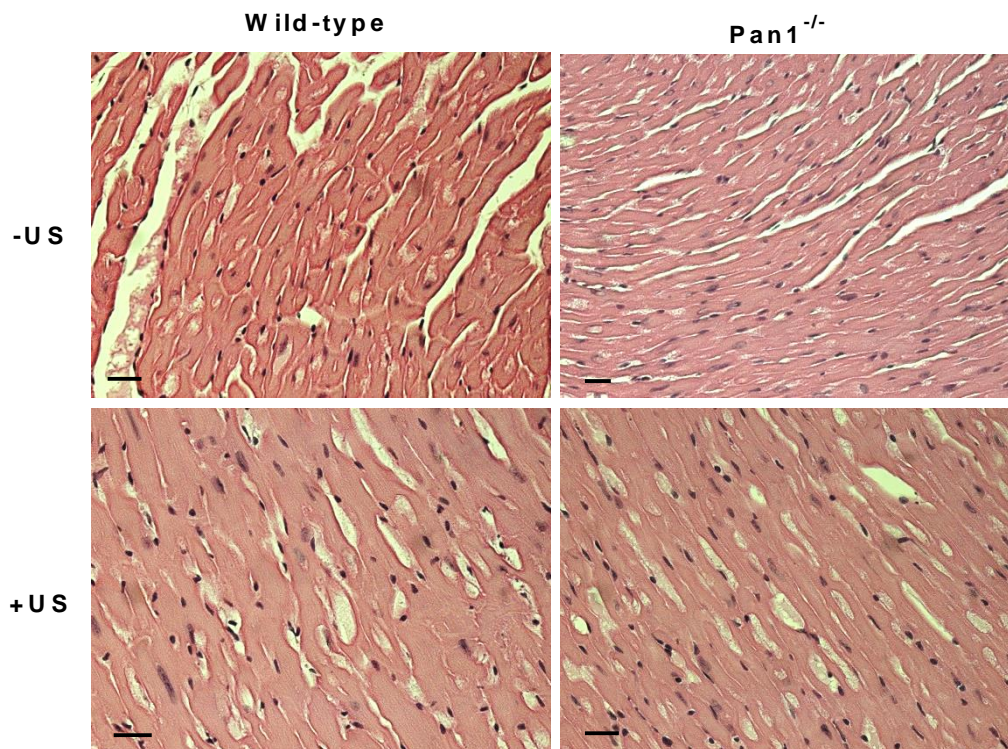

**Supplemental Figure 2.** Examples of histology with H&E staining of the anterior myocardium from wild-type and Pan1<sup>-/-</sup> mice from animals not treated with ultrasound (-US) and those undergoing US cavitation (+US).

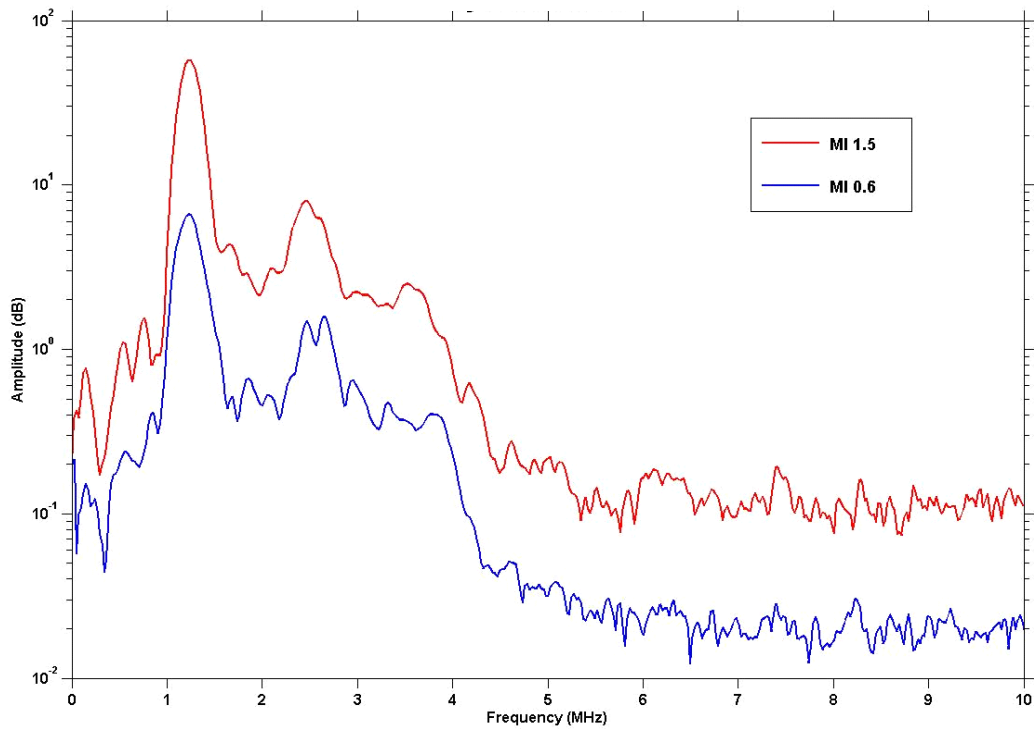

**Supplemental Figure 3.** Frequency-amplitude spectra from mice undergoing US cavitation of microbubbles. Data are shown for US delivered at an MI of 1.5 or 0.6 to model the low- and high-end boundaries of the possible acoustic pressures for in vivo experiments in mice and non-human primates. Amplitude is pressure related, but at MI of both 1.5 and 0.6 there is evidence for inertial cavitation evidenced by the broad spectrum signals between the harmonic peaks.
